# Supplementary material for: Sympathetic autonomic dysfunction and impaired cardiovascular performance in higher risk surgical patients: implications for perioperative sympatholysis
Source: HighWire-hosted journal article supplement (doi:10.1136/openhrt-2015-000268), 2015-10-01
Supplement: openhrt-2015-000268supp_tables.pdf [file openhrt-2015-000268supp_tables.pdf]

STROBE Statement—Checklist of items that should be included in reports of *cohort studies*

|                           | Item No | Recommendation                                                                                                                                                                       |                               |
|---------------------------|---------|--------------------------------------------------------------------------------------------------------------------------------------------------------------------------------------|-------------------------------|
| Title and abstract        | 1       | (a) Indicate the study’s design with a commonly used term in the title or the abstract                                                                                               | Page 1                        |
|                           |         | (b) Provide in the abstract an informative and balanced summary of what was done and what was found                                                                                  | Page 4                        |
| Introduction              |         |                                                                                                                                                                                      |                               |
| Background/rationale      | 2       | Explain the scientific background and rationale for the investigation being reported                                                                                                 | Page 6                        |
| Objectives                | 3       | State specific objectives, including any prespecified hypotheses                                                                                                                     | Page 7                        |
| Methods                   |         |                                                                                                                                                                                      |                               |
| Study design              | 4       | Present key elements of study design early in the paper                                                                                                                              | Pages 7                       |
| Setting                   | 5       | Describe the setting, locations, and relevant dates, including periods of recruitment, exposure, follow-up, and data collection                                                      | Pages 7,8                     |
| Participants              | 6       | (a) Give the eligibility criteria, and the sources and methods of selection of participants. Describe methods of follow-up                                                           | Page 7                        |
|                           |         | (b) For matched studies, give matching criteria and number of exposed and unexposed                                                                                                  | N/A                           |
| Variables                 | 7       | Clearly define all outcomes, exposures, predictors, potential confounders, and effect modifiers. Give diagnostic criteria, if applicable                                             | Page 9                        |
| Data sources/ measurement | 8*      | For each variable of interest, give sources of data and details of methods of assessment (measurement). Describe comparability of assessment methods if there is more than one group | Pages 9                       |
| Bias                      | 9       | Describe any efforts to address potential sources of bias                                                                                                                            | Page 8, line 2.               |
| Study size                | 10      | Explain how the study size was arrived at                                                                                                                                            | Page 9,10                     |
| Quantitative variables    | 11      | Explain how quantitative variables were handled in the analyses. If applicable, describe which groupings were chosen and why                                                         | Page 8.9                      |
| Statistical methods       | 12      | (a) Describe all statistical methods, including those used to control for confounding                                                                                                | Page 9                        |
|                           |         | (b) Describe any methods used to examine subgroups and interactions                                                                                                                  | Page 9                        |
|                           |         | (c) Explain how missing data were addressed                                                                                                                                          | N/A                           |
|                           |         | (d) If applicable, explain how loss to follow-up was addressed                                                                                                                       | N/A                           |
|                           |         | (e) Describe any sensitivity analyses                                                                                                                                                | N/A                           |
| Results                   |         |                                                                                                                                                                                      |                               |
| Participants              | 13*     | (a) Report numbers of individuals at each stage of study—eg numbers potentially eligible, examined for                                                                               | Pages 10.11; plus suppl. data |

|                          |     |                                                                                                                                                                                                              |                                                         |
|--------------------------|-----|--------------------------------------------------------------------------------------------------------------------------------------------------------------------------------------------------------------|---------------------------------------------------------|
|                          |     | eligibility, confirmed eligible, included in the study, completing follow-up, and analysed                                                                                                                   |                                                         |
|                          |     | (b) Give reasons for non-participation at each stage                                                                                                                                                         | Page 7.                                                 |
|                          |     | (c) Consider use of a flow diagram                                                                                                                                                                           |                                                         |
| Descriptive data         | 14* | (a) Give characteristics of study participants (eg demographic, clinical, social) and information on exposures and potential confounders                                                                     | Page 10.11; Tables 1+2; suppl. Tables 2,3               |
|                          |     | (b) Indicate number of participants with missing data for each variable of interest                                                                                                                          | Tables 1+2; suppl. Tables 2,3                           |
|                          |     | (c) Summarise follow-up time (eg, average and total amount)                                                                                                                                                  | P10                                                     |
| Outcome data             | 15* | Report numbers of outcome events or summary measures over time                                                                                                                                               | Page 10.11,                                             |
| Main results             | 16  | (a) Give unadjusted estimates and, if applicable, confounder-adjusted estimates and their precision (eg, 95% confidence interval). Make clear which confounders were adjusted for and why they were included | Page 10-11; Tables 1+2; suppl. Tables 2,3               |
|                          |     | (b) Report category boundaries when continuous variables were categorized                                                                                                                                    | 95% CI throughout manuscript.                           |
|                          |     | (c) If relevant, consider translating estimates of relative risk into absolute risk for a meaningful time period                                                                                             | Relative Risk [RR] hazard ratios throughout manuscript. |
| Other analyses           | 17  | Report other analyses done—eg analyses of subgroups and interactions, and sensitivity analyses                                                                                                               | Tables 3-6                                              |
| <b>Discussion</b>        |     |                                                                                                                                                                                                              |                                                         |
| Key results              | 18  | Summarise key results with reference to study objectives                                                                                                                                                     | Page 12                                                 |
| Limitations              | 19  | Discuss limitations of the study, taking into account sources of potential bias or imprecision. Discuss both direction and magnitude of any potential bias                                                   | Page 12-14                                              |
| Interpretation           | 20  | Give a cautious overall interpretation of results considering objectives, limitations, multiplicity of analyses, results from similar studies, and other relevant evidence                                   | Pages 14                                                |
| Generalisability         | 21  | Discuss the generalisability (external validity) of the study results                                                                                                                                        | Page 15                                                 |
| <b>Other information</b> |     |                                                                                                                                                                                                              |                                                         |
| Funding                  | 22  | Give the source of funding and the role of the funders for the present study and, if applicable, for the original study on which the present article is based                                                | See acknowledgments.                                    |

Supplementary Table 2. Drug therapies in subset of cohort, University College London Hospital.

ACE- angiotensin converting enzyme

|               | Normal     | AHRR       | P value |
|---------------|------------|------------|---------|
| Nitrate       | 11 (3.5%)  | 10 (4.8%)  | 0.67    |
| Beta-blocker  | 45 (14.2%) | 27 (13.0%) | 0.67    |
| ACE inhibitor | 68 (21.6%) | 38 (18.4%) | 0.37    |
| Statin        | 96 (30.5%) | 63 (30.4%) | 0.99    |

Supplementary Table 3. Comorbidity in University College London Hospital.

TIA- transient ischemic event

|                                     | Normal    | AHRR      | P value |
|-------------------------------------|-----------|-----------|---------|
| Diabetes mellitus                   | 42 (13%)  | 19 (9.1%) | 0.23    |
| Hypertension                        | 130 (41%) | 79 (38%)  | 0.38    |
| Coronary artery disease             | 18 (5.5%) | 18 (8.6%) | 0.19    |
| Stroke/TIA                          | 15 (4.8%) | 12 (5.7%) | 0.94    |
| Chronic obstructive airways disease | 23 (7.3%) | 12 (5.8%) | 0.94    |
